# Supplementary material for: Efficient Synthesis and Characterization of Polyaniline@Aluminium–Succinate Metal-Organic Frameworks Nanocomposite and Its Application for Zn(II) Ion Sensing
Source: MDPI journal article supplement (doi:10.3390/polym13193383), 2021-09-30
Supplement: s1 [file s1]

**Efficient Electrocatalytic Performance of PANI@Al-SA MOF Nanocomposite for  
Zn(II) Reduction**

Amjad E. Alsafrani <sup>a,b</sup>, Waheed A. Adeosun<sup>a</sup>, Hadi M. Marwani<sup>a,c</sup>, Imran Khan<sup>d</sup>, Abdullah  
M. Asiri<sup>a,c</sup>, Anish Khan<sup>a,c\*</sup>

<sup>a</sup> Department of Chemistry, Faculty of Science, King Abdulaziz University, P.O Box 80203,  
Jeddah 21589, Saudi Arabia.

<sup>b</sup> University of Jeddah, College of science, Department of Chemistry, Jeddah, Saudi Arabia.

<sup>c</sup> Center of Excellence for Advanced Materials Research, King Abdulaziz University, P.O Box  
80203, Jeddah 21589, Saudi Arabia.

<sup>d</sup> Applied Sciences and Humanities Section, University Polytechnic, Faculty of Engineering  
and Technology, Aligarh Muslim University, Aligarh – 202002, India

**SUPPOORTING INFORMATION TO THIS ARTICLE**

**S1 (a) Cyclic voltametric studies of PANI@Al-SA modified GCE toward 1mM ferricyanide at different scan rates.**

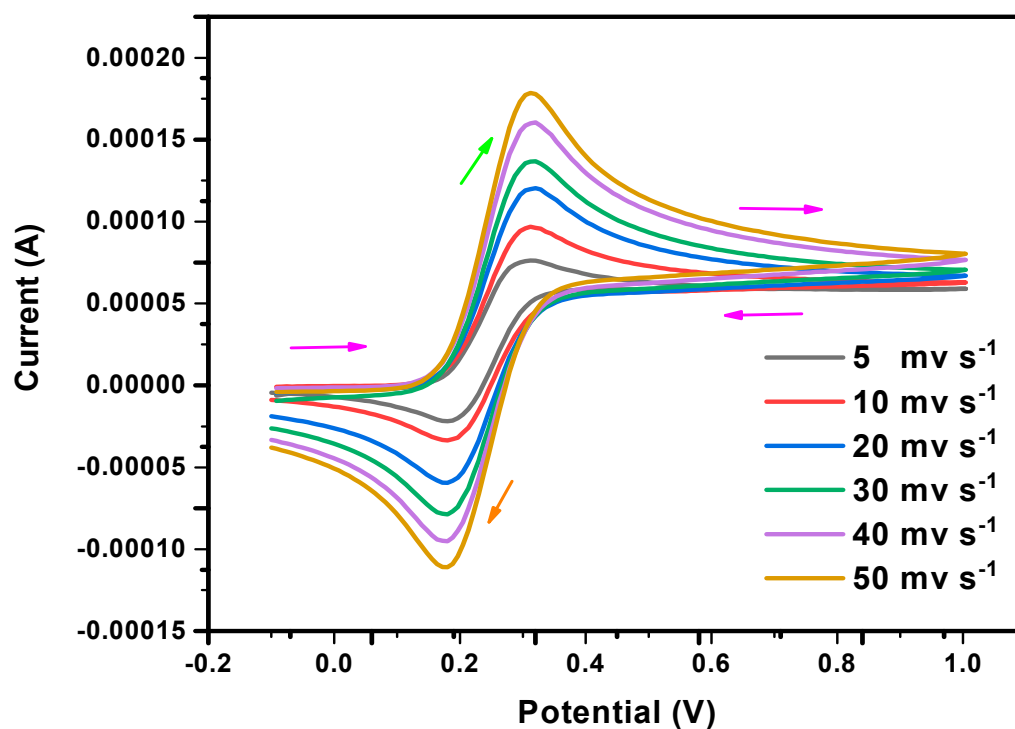

Figure S1. (a) Cyclic voltametric response of PANI@Al-SA modified GCE containing 1mM ferricyanide (in 0.1M KC) at a scan rate from 5 mV/s to 50 mV/s Inset: The pink, green and orange arrows indicate scan direction, anodic and cathodic peaks, respectively.

**S1 (b) Calibration plot of data obtained from cyclic voltametric of PANI@Al-SA modified GCE toward 1mM ferricyanide at various scan rates.**

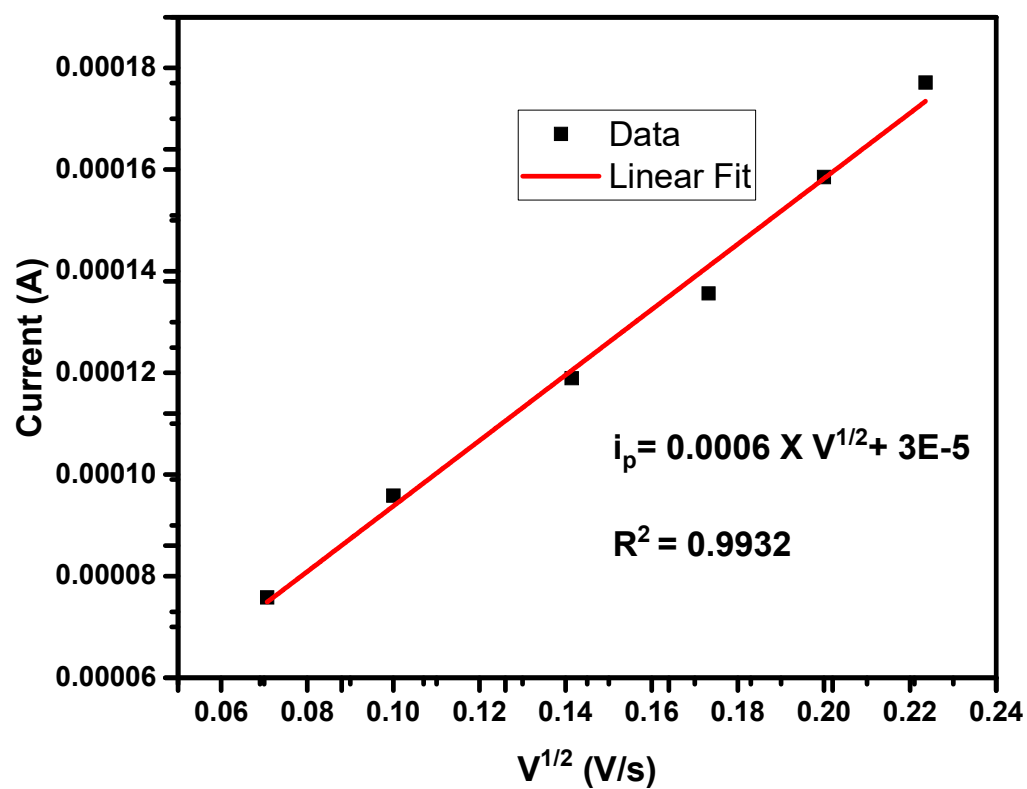

Figure S1. (b) Plot of anodic peak current against square root of scan rate.

**S2 Equivalent circuits applied for Electrochemical impedance spectroscopy for bare glassy carbon electrode (GCE) and PANI@Al-SA coated GCE.**

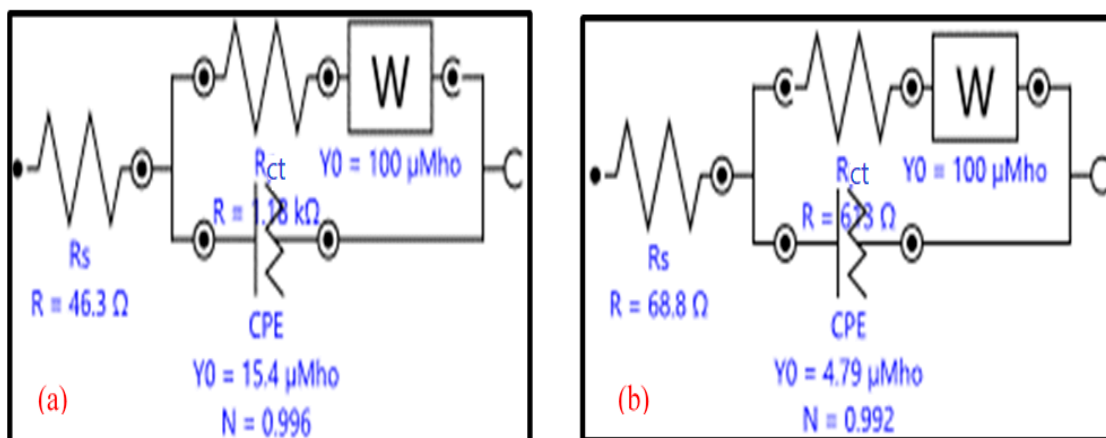

Figure S2. (a) Graphs showing equivalent circuits used for Electrochemical impedance spectroscopy fitting for bare GCE and (b) PANI@Al-SA modified GCE;  $R_{ct}$ : charge transfer resistance,  $R_s$ : solution resistance, CPE : constant phase element and W:Warburg impedance.

**S3 Tafel plot obtained from cyclic voltametric of PANI@Al-SA coated GCE toward 0.065 mM zinc ion at different scan rate.**

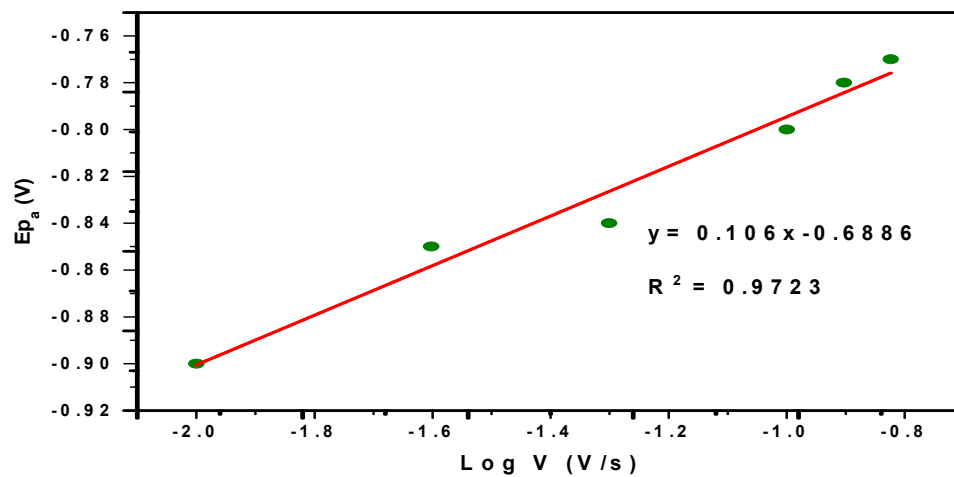

Figure S3. Tafel plot obtained from CV in Fig. 9 (a)

S4 Calibration plot of data obtained from cyclic voltametric of PANI@Al-SA modified GCE toward 0.065 Zn<sup>2+</sup> at scan rate from 10 mv/s to 150 mv/s

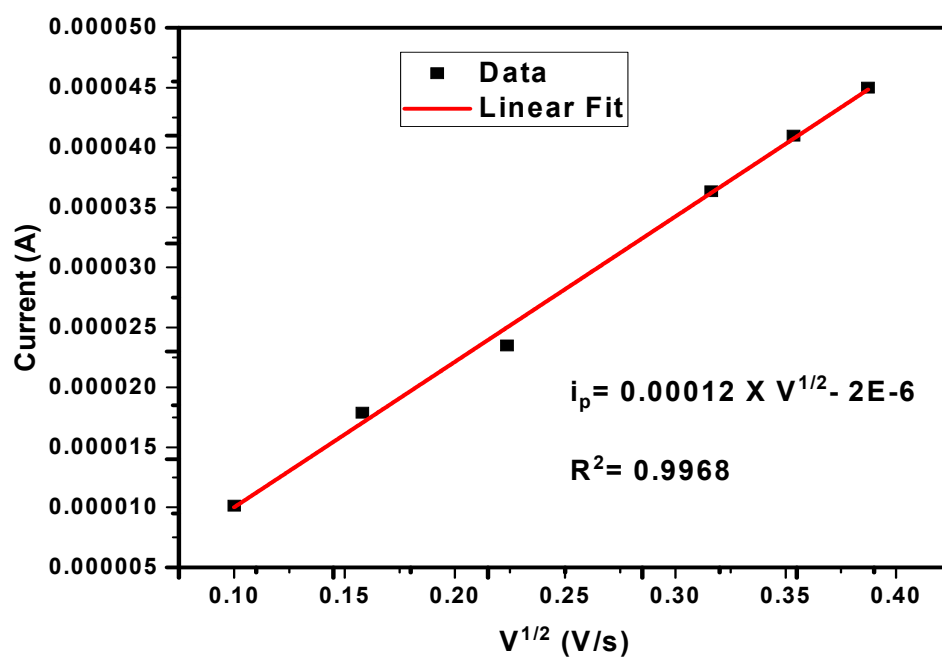

Fig. S4. plot of current peak vs square root of scan rate which obtained from CV in Fig. 9

(a)

**Table S1.** Result of EIS data fitting for bare GCE.

| Element | Parameter | Value      |
|---------|-----------|------------|
| Rs      | R         | 46.31      |
| Rct     | R         | 1183.3     |
| CPE     | Y0        | 1.5397E-05 |
|         | N         | 0.99617    |
| W1      | Y0        | 0.0001     |

**Table S2.** Result of EIS data fitting for PANI@Al-SA modified GCE

| Element | Parameter | Value      |
|---------|-----------|------------|
| Rs      | R         | 68.795     |
| Rct     | R         | 612.82     |
| CPE     | Y0        | 4.7935E-06 |
|         | N         | 0.99203    |
| W1      | Y0        | 0.0001     |

## S5 Electrochemical variables calculations

*Electron transfer coefficient ( $\alpha$ )*

$$\alpha = 47.7 / (E_p - E_{p/2})$$

$$\alpha = 47.7 / [(-922) - (-977)] \text{ mV}$$

$$\alpha = 0.86$$

*Number of electrons transferred ( $n$ )*

$n$  calculated from combination Tafel plot with the following eq:

$$b = \frac{2.303RT}{(1 - \alpha)nF}$$

$$n = 1.96$$

*Diffusion coefficient ( $D$ )*

$D$  was calculated by using Randles sevcik equation

$$i_p = (2.69 \times 10^5) \times A \times n^{3/2} \times D^{1/2} \times C \times v^{1/2}$$

$$D = 7.96 \times 10^{-6} \text{ cm}^2 \text{ s}^{-1}$$
